# Supplementary material
Source: bioRxiv or medRxiv preprint supplement (http://medrxiv.org/highwire/filestream/82800/field_highwire_adjunct_files/0/2020.05.26.20104497-1.pdf)
Supplement: Supplementary file [file 2020.05.26.20104497-1.pdf]

## Supplementary material to:

### *Knowledge and attitude towards COVID-19 in Bangladesh: Population-level estimation and a comparison of data obtained by phone and online survey methods*

Anwarul Karim<sup>1,2</sup>; Mastura Akter<sup>1,3</sup>; AHM Thafikul Mazid<sup>1,4</sup>; Orindom Shing Pulock<sup>1,5</sup>; Tasmiah Tahera Aziz<sup>1</sup>; Samira Hayee<sup>1</sup>; Nowrin Tamanna<sup>1</sup>; GS Chuwdhury<sup>6,7</sup>; Afsana Haque<sup>8,9</sup>; Farhana Yeasmin<sup>10</sup>; Mashkura Akter Mitu<sup>11</sup>; Farjana Yeasmin<sup>12</sup>; Humayun Rashid<sup>13</sup>; Ashish Kumar Kuri<sup>1,5</sup>; Arni Das<sup>1</sup>; Koushik Majumder<sup>5</sup>; Dipen Barua<sup>14</sup>; Md Mahabubur Rahaman<sup>15</sup>; Sanjida Akter<sup>16</sup>; Nashid Niaz Munia<sup>13</sup>; Jabin Sultana<sup>17</sup>; Faeeqa Usaila<sup>3</sup>; Sabrina Sifat<sup>18</sup>; Nishat Anjum Nourin<sup>1,5</sup>; Md Forhad Uddin<sup>19</sup>; Mrinmoy Bhowmik<sup>20</sup>; Tanvir Ahammed<sup>21</sup>; Nabil Sharik<sup>22</sup>; Quddus Mehnaz<sup>23</sup>; Md Nur Hossain Bhuiyan<sup>24</sup>; Tahmina Banu<sup>1\*</sup>

## Supplementary methods

### Raking the phone survey dataset to adjust to the online nonmedical dataset

- Complete convergence was achieved after 22 iterations in anesrake version 0.80

### Raking the phone survey dataset to adjust to the adult population level

- Target population level proportions used for raking:
  - Gender
    - Male: 0.527
    - Female: 0.473
  - Education
    - ≤ Grade 5: 0.734
    - Grade 6 to grade 12 (HSC): 0.230
    - ≥ HSC to bachelor: 0.024
    - ≥ Bachelor to Master or above: 0.012
  - Living area
    - Rural: 0.634
    - Urban/town: 0.366
  - Economic condition
    - Poor: 0.218
    - Middle-class/rich: 0.782
- Complete convergence was achieved after 608 iterations

### Google Trends for search term “coronavirus”

- Data on Google Trends for the search term “coronavirus” was extracted from <https://trends.google.com/trends/explore?date=2020-03-05%202020-04-30&geo=BD&q=coronavirus>
- The Polynomial trendline (Order 6) that is shown in Fig. 2 of the manuscript was created with MS Excel

### News Trends related to COVID-19 in popular online newspapers

Two popular online news portals (www.prothomalo.com, www.jagonews24.com ) were used for this purpose. We first calculated the total number of reports in both news portals with keyword “corona” on each day from March 5 to April 30, 2020. Then the highest total was considered as 100% and the other total number of reports for each day was then expressed as percentage relative to the highest number. The Polynomial trendline (Order 6) that is shown in Fig. 2 of the manuscript was created with MS Excel

## Supplementary results

**Table S1** Distribution of the participants according to the eight administrative divisions of Bangladesh

| Administrative divisions | Phone,<br>n=1426 | Online non-medical,<br>n=1097 | Online medical,<br>n=382 | $\chi^2$ (df)<br>P-value | Total,<br>n=2905 |
|--------------------------|------------------|-------------------------------|--------------------------|--------------------------|------------------|
|                          | n (%)            | n (%)                         | n (%)                    |                          | n (%)            |
| Chattogram               | 610 (42.8)       | 488 (44.5)                    | 200 (52.4)               | <b>&lt;0.001</b>         | 1298 (44.7)      |
| Dhaka                    | 325 (22.8)       | 408 (37.2)                    | 119 (31.2)               |                          | 852 (29.3)       |
| Khulna                   | 56 (3.9)         | 57 (5.2)                      | 20 (5.2)                 |                          | 133 (4.6)        |
| Mymensingh               | 215 (15.1)       | 51 (4.6)                      | 10 (2.6)                 |                          | 276 (9.5)        |
| Rajshahi                 | 70 (4.9)         | 39 (3.6)                      | 9 (2.4)                  |                          | 118 (4.1)        |
| Sylhet                   | 47 (3.3)         | 27 (2.5)                      | 6 (1.6)                  |                          | 80 (2.8)         |
| Barishal                 | 68 (4.8)         | 14 (1.3)                      | 10 (2.6)                 |                          | 92 (3.2)         |
| Rangpur                  | 35 (2.5)         | 13 (1.2)                      | 8 (2.1)                  |                          | 56 (1.9)         |

**Fig. S1** Heatmap showing the administrative division-wise distribution of all the participants (n=2905)

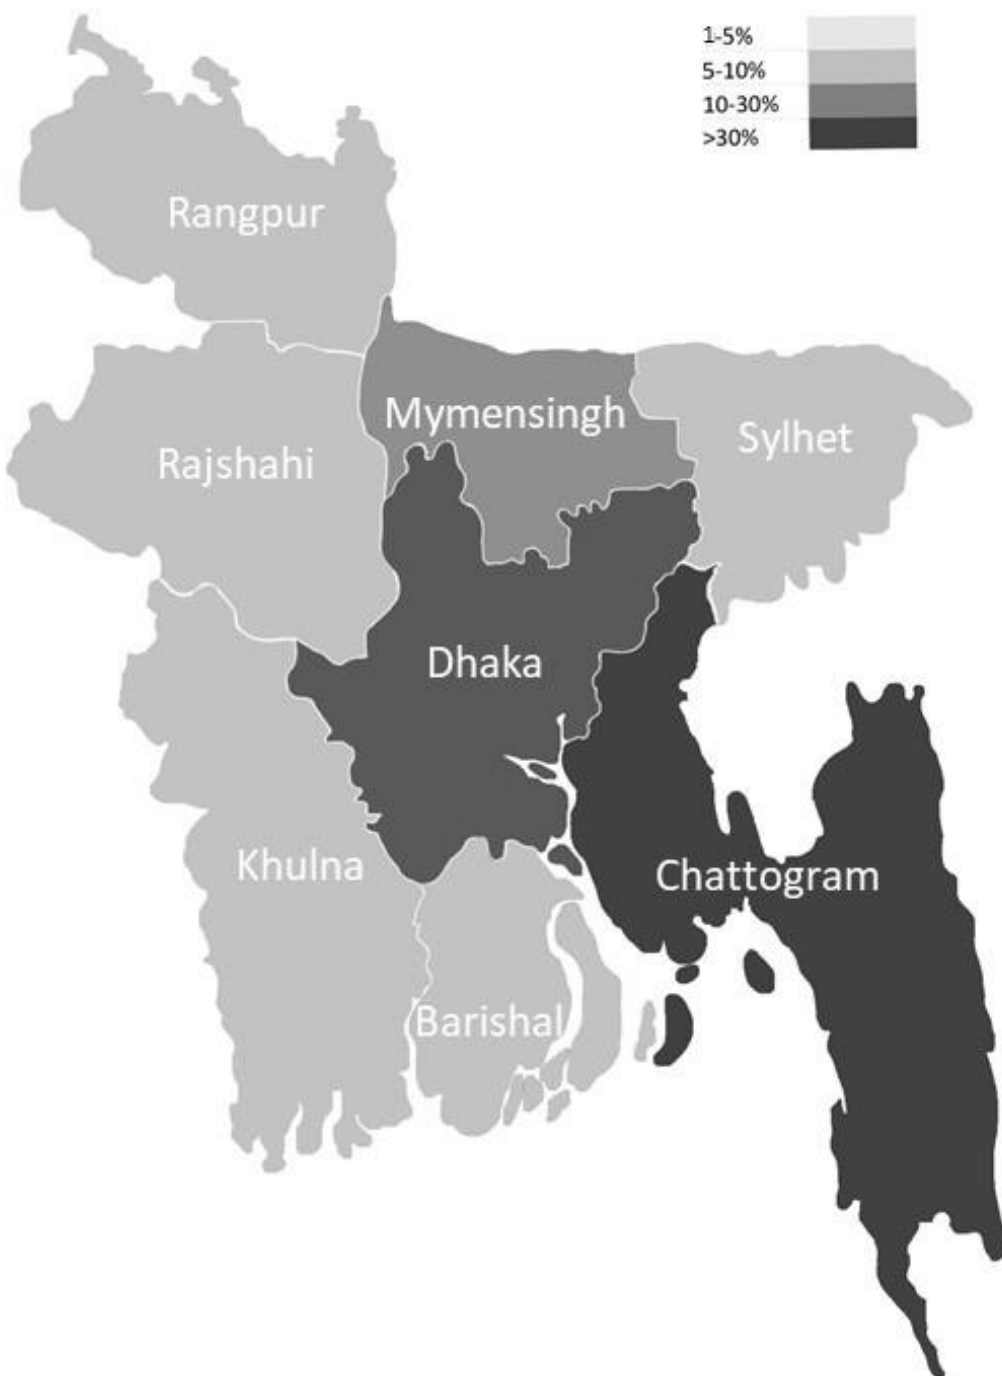

**Table S2** Responses to the attitude question A1 [“Do you think that this new coronavirus will finally be under control completely?”] by sociodemographic characteristics and source of information

|                                          |                               | Online non-medical, n=1097 |            |            | Online medical, n=382 |           |            |
|------------------------------------------|-------------------------------|----------------------------|------------|------------|-----------------------|-----------|------------|
|                                          |                               | Yes                        | No         | Don't know | Yes                   | No        | Don't know |
|                                          |                               | n (%)                      | n (%)      | n (%)      | n (%)                 | n (%)     | n (%)      |
| <b>Socio-demographic characteristics</b> |                               |                            |            |            |                       |           |            |
| Age (years)                              | ≥18 - <35                     | 546 (60.6)                 | 94 (10.4)  | 261 (29)   | 196 (56.5)            | 59 (17)   | 92 (26.5)  |
|                                          | ≥35 - <55                     | 109 (63)                   | 23 (13.3)  | 41 (23.7)  | 14 (50)               | 2 (7.1)   | 12 (42.9)  |
|                                          | ≥55                           | 15 (65.2)                  | 2 (8.7)    | 6 (26.1)   | 4 (57.1)              | 2 (28.6)  | 1 (14.3)   |
| Gender                                   | Male                          | 472 (63.5)                 | 86 (11.6)  | 185 (24.9) | 103 (64)              | 32 (19.9) | 26 (16.1)  |
|                                          | Female                        | 198 (55.9)                 | 33 (9.3)   | 123 (34.7) | 111 (50.2)            | 31 (14)   | 79 (35.7)  |
| Education                                | ≤ Grade 5                     | 0 (0)                      | 0 (0)      | 2 (100)    |                       |           |            |
|                                          | Grade 6 to 12                 | 36 (55.4)                  | 5 (7.7)    | 24 (36.9)  |                       |           |            |
|                                          | > Grade 12 to Bachelor        | 347 (60.8)                 | 66 (11.6)  | 158 (27.7) | 157 (58.4)            | 41 (15.2) | 71 (26.4)  |
|                                          | > Bachelor to Master or above | 287 (62.5)                 | 48 (10.5)  | 124 (27)   | 57 (50.4)             | 22 (19.5) | 34 (30.1)  |
| Lived mostly in last 4 months            | Village                       | 79 (62.2)                  | 12 (9.4)   | 36 (28.3)  | 21 (55.3)             | 8 (21.1)  | 9 (23.7)   |
|                                          | Urban/town                    | 578 (60.8)                 | 105 (11.1) | 267 (28.1) | 191 (56.2)            | 55 (16.2) | 94 (27.6)  |
|                                          | Other                         | 13 (65)                    | 2 (10)     | 5 (25)     | 2 (50)                | 0 (0)     | 2 (50)     |
| Financial condition                      | Poor                          | 25 (55.6)                  | 2 (4.4)    | 18 (40)    |                       |           |            |
|                                          | Middle-class                  | 623 (61.6)                 | 110 (10.9) | 279 (27.6) | 197 (56.1)            | 56 (16)   | 98 (27.9)  |
|                                          | Rich                          | 22 (55)                    | 7 (17.5)   | 11 (27.5)  | 17 (54.8)             | 7 (22.6)  | 7 (22.6)   |
| <b>Source of information</b>             |                               |                            |            |            |                       |           |            |
| Television                               | Yes                           | 347 (61.4)                 | 58 (10.3)  | 160 (28.3) | 104 (56.8)            | 32 (17.5) | 47 (25.7)  |
|                                          | No                            | 323 (60.7)                 | 61 (11.5)  | 148 (27.8) | 110 (55.3)            | 31 (15.6) | 58 (29.1)  |
| Newspaper                                | Yes                           | 213 (63.8)                 | 39 (11.7)  | 82 (24.6)  | 68 (56.7)             | 20 (16.7) | 32 (26.7)  |
|                                          | No                            | 457 (59.9)                 | 80 (10.5)  | 226 (29.6) | 146 (55.7)            | 43 (16.4) | 73 (27.9)  |
| Internet                                 | Yes                           | 565 (59.8)                 | 112 (11.9) | 268 (28.4) | 189 (56.1)            | 54 (16)   | 94 (27.9)  |
|                                          | No                            | 105 (69.1)                 | 7 (4.6)    | 40 (26.3)  | 25 (55.6)             | 9 (20)    | 11 (24.4)  |
| Other people                             | Yes                           | 99 (60.7)                  | 22 (13.5)  | 42 (25.8)  | 45 (63.4)             | 8 (11.3)  | 18 (25.4)  |
|                                          | No                            | 571 (61.1)                 | 97 (10.4)  | 266 (28.5) | 169 (54.3)            | 55 (17.7) | 87 (28)    |
| Other ways                               | Yes                           | 28 (58.3)                  | 6 (12.5)   | 14 (29.2)  | 22 (52.4)             | 5 (11.9)  | 15 (35.7)  |
|                                          | No                            | 642 (61.2)                 | 113 (10.8) | 294 (28)   | 192 (56.5)            | 58 (17.1) | 90 (26.5)  |
| Total                                    |                               | 670 (61.1)                 | 119 (10.8) | 308 (28.1) | 214 (56)              | 63 (16.5) | 105 (27.5) |

**Table S3** Responses to the attitude question A2 [“This virus is created by humans” - this kind of discourse is heard. Do you believe that it is true?] by sociodemographic characteristics and source of information

|                                          |                               | Online non-medical, n=1097 |            |            | Online medical, n=382 |            |            |
|------------------------------------------|-------------------------------|----------------------------|------------|------------|-----------------------|------------|------------|
|                                          |                               | Yes                        | No         | Don't know | Yes                   | No         | Don't know |
|                                          |                               | n (%)                      | n (%)      | n (%)      | n (%)                 | n (%)      | n (%)      |
| <b>Socio-demographic characteristics</b> |                               |                            |            |            |                       |            |            |
| Age (years)                              | ≥18 - <35                     | 167 (18.5)                 | 231 (25.6) | 503 (55.8) | 64 (18.4)             | 123 (35.4) | 160 (46.1) |
|                                          | ≥35 - <55                     | 38 (22)                    | 45 (26)    | 90 (52)    | 5 (17.9)              | 12 (42.9)  | 11 (39.3)  |
|                                          | ≥55                           | 5 (21.7)                   | 4 (17.4)   | 14 (60.9)  | 0 (0)                 | 3 (42.9)   | 4 (57.1)   |
| Gender                                   | Male                          | 146 (19.7)                 | 194 (26.1) | 403 (54.2) | 26 (16.1)             | 68 (42.2)  | 67 (41.6)  |
|                                          | Female                        | 64 (18.1)                  | 86 (24.3)  | 204 (57.6) | 43 (19.5)             | 70 (31.7)  | 108 (48.9) |
| Education                                | ≤ Grade 5                     | 0 (0)                      | 0 (0)      | 2 (100)    |                       |            |            |
|                                          | Grade 6 to 12                 | 17 (26.2)                  | 15 (23.1)  | 33 (50.8)  |                       |            |            |
|                                          | > Grade 12 to Bachelor        | 112 (19.6)                 | 143 (25)   | 316 (55.3) | 50 (18.6)             | 95 (35.3)  | 124 (46.1) |
|                                          | > Bachelor to Master or above | 81 (17.6)                  | 122 (26.6) | 256 (55.8) | 19 (16.8)             | 43 (38.1)  | 51 (45.1)  |
| Lived mostly in last 4 months            | Village                       | 23 (18.1)                  | 32 (25.2)  | 72 (56.7)  | 13 (34.2)             | 14 (36.8)  | 11 (28.9)  |
|                                          | Urban/town                    | 184 (19.4)                 | 239 (25.2) | 527 (55.5) | 55 (16.2)             | 122 (35.9) | 163 (47.9) |
|                                          | Other                         | 3 (15)                     | 9 (45)     | 8 (40)     | 1 (25)                | 2 (50)     | 1 (25)     |
| Financial condition                      | Poor                          | 11 (24.4)                  | 14 (31.1)  | 20 (44.4)  |                       |            |            |
|                                          | Middle-class                  | 191 (18.9)                 | 258 (25.5) | 563 (55.6) | 59 (16.8)             | 130 (37)   | 162 (46.2) |
|                                          | Rich                          | 8 (20)                     | 8 (20)     | 24 (60)    | 10 (32.3)             | 8 (25.8)   | 13 (41.9)  |
| <b>Source of information</b>             |                               |                            |            |            |                       |            |            |
| Television                               | Yes                           | 103 (18.2)                 | 136 (24.1) | 326 (57.7) | 36 (19.7)             | 62 (33.9)  | 85 (46.4)  |
|                                          | No                            | 107 (20.1)                 | 144 (27.1) | 281 (52.8) | 33 (16.6)             | 76 (38.2)  | 90 (45.2)  |
| Newspaper                                | Yes                           | 60 (18)                    | 78 (23.4)  | 196 (58.7) | 24 (20)               | 38 (31.7)  | 58 (48.3)  |
|                                          | No                            | 150 (19.7)                 | 202 (26.5) | 411 (53.9) | 45 (17.2)             | 100 (38.2) | 117 (44.7) |
| Internet                                 | Yes                           | 178 (18.8)                 | 240 (25.4) | 527 (55.8) | 63 (18.7)             | 116 (34.4) | 158 (46.9) |
|                                          | No                            | 32 (21.1)                  | 40 (26.3)  | 80 (52.6)  | 6 (13.3)              | 22 (48.9)  | 17 (37.8)  |
| Other people                             | Yes                           | 22 (13.5)                  | 41 (25.2)  | 100 (61.3) | 13 (18.3)             | 27 (38)    | 31 (43.7)  |
|                                          | No                            | 188 (20.1)                 | 239 (25.6) | 507 (54.3) | 56 (18)               | 111 (35.7) | 144 (46.3) |
| Other ways                               | Yes                           | 8 (16.7)                   | 11 (22.9)  | 29 (60.4)  | 7 (16.7)              | 16 (38.1)  | 19 (45.2)  |
|                                          | No                            | 202 (19.3)                 | 269 (25.6) | 578 (55.1) | 62 (18.2)             | 122 (35.9) | 156 (45.9) |
| Total                                    |                               | 210 (19.1)                 | 280 (25.5) | 607 (55.3) | 69 (18.1)             | 138 (36.1) | 175 (45.8) |
